# Supplementary material for: Evolution of the Eye Transcriptome under Constant Darkness in Sinocyclocheilus Cavefish
Source: PubMed Central journal article supplement — Mol Biol Evol. 2013 Apr 23;30(7):1527–43. doi: 10.1093/molbev/mst079 (PMC3684860; doi:10.1093/molbev/mst079), 2013-04-23
Supplement: supp_mst079_Supplementary_Material.pdf [file supp_mst079_Supplementary_Material.pdf]

# SUPPLEMENTARY MATERIALS

Evolution of the eye transcriptome under constant darkness in

*Sinocyclocheilus cavefish*

Fanwei Meng<sup>1,2</sup>, Ingo Braasch<sup>2</sup>, Jennifer B. Phillips<sup>2</sup>, Xiwen Lin<sup>1</sup>, Tom Titus<sup>2</sup>, Chunguang  
Zhang<sup>1§</sup> and John H. Postlethwait<sup>2§</sup>

1 Institute of Zoology, Chinese Academy of Sciences, Beijing 100101, P.R. China.

2 Institute of Neuroscience, University of Oregon, Eugene, OR 97403, USA

§ Corresponding author: John H. Postlethwait, E-mail: [jpostle@uoneuro.uoregon.edu](mailto:jpostle@uoneuro.uoregon.edu);

co-corresponding author: Chunguang Zhang E-mail: [fish@ioz.ac.cn](mailto:fish@ioz.ac.cn)

**Table S1: Summary of RNA-seq and *de novo* assembly of *Sinocyclotheilus***

|                        | Number      | Total nucleotides | N50   | Mean size | N90 |
|------------------------|-------------|-------------------|-------|-----------|-----|
| Reads                  | 132,682,597 | 9,179,015,231     | 69    | 69        | 69  |
| Contig of surface fish | 156,118     | 82,820,563        | 534   | 531       | 332 |
| Contig of cave fish    | 152,464     | 80,128,332        | 525   | 526       | 332 |
| Merged contig          | 56,074      | 52,620,732        | 1,030 | 939       | 539 |

**Table S3: Enriched Pathways and Diseases Identified by KOBAS**

| Pathways or Diseases                                                                                                | Database     | Pathway Id        | Sample number | Background number | P-Value  |
|---------------------------------------------------------------------------------------------------------------------|--------------|-------------------|---------------|-------------------|----------|
| <b>Down-regulated group (Enriched Pathway)</b>                                                                      |              |                   |               |                   |          |
| Visual signal transduction: Cones                                                                                   | PID Curated  | cone_pathway      | 22 / 211      | 31 / 1685         | 3.35E-11 |
| Heterotrimeric G-protein signaling pathway-rod outer segment phototransduction                                      | PANTHER      | P00028            | 27 / 185      | 47 / 1442         | 5.45E-11 |
| Phototransduction                                                                                                   | KEGG PATHWAY | hsa04744          | 25 / 404      | 42 / 3361         | 5.45E-11 |
| Visual signal transduction: Rods                                                                                    | PID Curated  | rhodopsin_pathway | 20 / 211      | 32 / 1685         | 4.02E-09 |
| Respiratory electron transport, ATP synthesis by chemiosmotic coupling, and heat production by uncoupling proteins. | Reactome     | REACT:6305        | 26 / 315      | 81 / 2914         | 1.58E-05 |
| Synaptic Transmission                                                                                               | Reactome     | REACT:13685       | 42 / 315      | 194 / 2914        | 0.000393 |
| Oxidative phosphorylation                                                                                           | KEGG PATHWAY | hsa00190          | 30 / 404      | 108 / 3361        | 0.000453 |
| Parkinson's disease                                                                                                 | KEGG PATHWAY | hsa05012          | 28 / 404      | 105 / 3361        | 0.001992 |
| g-protein signaling through tubby proteins                                                                          | PID BioCarta | 100009            | 6 / 91        | 9 / 896           | 0.004251 |
| Signaling by GPCR                                                                                                   | Reactome     | REACT:14797       | 37 / 315      | 187 / 2914        | 0.007512 |
| Purine metabolism                                                                                                   | KEGG PATHWAY | hsa00230          | 24 / 404      | 98 / 3361         | 0.011324 |
| regulation of spermatogenesis by crem                                                                               | PID BioCarta | 100197            | 5 / 91        | 8 / 896           | 0.011986 |
| chrebp regulation by carbohydrates and camp                                                                         | PID BioCarta | 100203            | 7 / 91        | 16 / 896          | 0.012695 |

|                                                                                                          |              |          |          |            |          |
|----------------------------------------------------------------------------------------------------------|--------------|----------|----------|------------|----------|
| Heterotrimeric G-protein signaling pathway-Gi alpha and Gs alpha mediated pathway                        | PANTHER      | P00026   | 24 / 185 | 95 / 1442  | 0.012695 |
| Pyrimidine catabolism                                                                                    | PID Reactome | 500232   | 3 / 110  | 3 / 1236   | 0.017205 |
| corticosteroids and cardioprotection                                                                     | PID BioCarta | 100156   | 7 / 91   | 17 / 896   | 0.017563 |
| cystic fibrosis transmembrane conductance regulator (cftr) and beta 2 adrenergic receptor (b2ar) pathway | PID BioCarta | 100205   | 7 / 91   | 17 / 896   | 0.017563 |
| Muscarinic acetylcholine receptor 2 and 4 signaling pathway                                              | PANTHER      | P00043   | 16 / 185 | 56 / 1442  | 0.023385 |
| Gastric acid secretion                                                                                   | KEGG PATHWAY | hsa04971 | 16 / 404 | 59 / 3361  | 0.023855 |
| attenuation of gpcr signaling                                                                            | PID BioCarta | 100253   | 6 / 91   | 14 / 896   | 0.029359 |
| Alzheimer's disease                                                                                      | KEGG PATHWAY | hsa05010 | 33 / 404 | 164 / 3361 | 0.031419 |
| Olfactory transduction                                                                                   | KEGG PATHWAY | hsa04740 | 10 / 404 | 30 / 3361  | 0.035676 |
| <b>Down-regulated group (Enriched Diseases)</b>                                                          |              |          |          |            |          |
| Retinitis pigmentosa                                                                                     | FunDO        | 1705     | 18 / 281 | 35 / 2232  | 3.47E-06 |
| Retinal disease                                                                                          | FunDO        | 2178     | 22 / 281 | 62 / 2232  | 0.000248 |
| VISION                                                                                                   | GAD          |          | 18 / 220 | 51 / 1707  | 0.002021 |
| Retinitis punctata albescens                                                                             | OMIM         | None     | 8 / 219  | 13 / 1577  | 0.005431 |
| cone-rod dystrophy                                                                                       | GAD          |          | 5 / 220  | 6 / 1707   | 0.007512 |
| Macular dystrophy, patterned                                                                             | OMIM         | None     | 5 / 219  | 6 / 1577   | 0.008204 |

|                                              |              |                         |          |           |          |
|----------------------------------------------|--------------|-------------------------|----------|-----------|----------|
| Leber optic atrophy                          | KEGG DISEASE | H00068                  | 6 / 57   | 10 / 462  | 0.011324 |
| Mitochondrial complex I deficiency           | OMIM         | None                    | 5 / 219  | 7 / 1577  | 0.018464 |
| Pheochromocytoma                             | OMIM         | None                    | 5 / 219  | 7 / 1577  | 0.018464 |
| achromatopsia                                | GAD          |                         | 3 / 220  | 3 / 1707  | 0.038897 |
| paragangliomas, head and neck                | GAD          |                         | 3 / 220  | 3 / 1707  | 0.038897 |
| Bradyopsia                                   | OMIM         | None                    | 3 / 219  | 3 / 1577  | 0.043356 |
| Pachyonychia congenita, Jackson-Lawler type  | OMIM         | None                    | 3 / 219  | 3 / 1577  | 0.043356 |
| <b>Up-regulated group (Enriched Pathway)</b> |              |                         |          |           |          |
| Intestinal immune network for IgA production | KEGG PATHWAY | hsa04672                | 3 / 157  | 7 / 3361  | 0.044873 |
| Cytokine-cytokine receptor interaction       | KEGG PATHWAY | hsa04060                | 10 / 157 | 48 / 3361 | 0.004537 |
| Beta2 integrin cell surface interactions     | PID Curated  | integrin2_pathway       | 5 / 74   | 13 / 1685 | 0.006697 |
| Pertussis                                    | KEGG PATHWAY | hsa05133                | 7 / 157  | 40 / 3361 | 0.035581 |
| Staphylococcus aureus infection              | KEGG PATHWAY | hsa05150                | 7 / 157  | 12 / 3361 | 4.43E-05 |
| Muscle contraction                           | Reactome     | REACT:17044             | 15 / 147 | 55 / 2914 | 8.57E-06 |
| glycolysis I                                 | BioCyc       | GLYCOLYSIS              | 5 (29)   | 23 / 562  | 0.044873 |
| intrinsic prothrombin activation pathway     | PID BioCarta | 100122                  | 3 (31)   | 6 / 896   | 0.017292 |
| EphrinA-EPHA pathway                         | PID Curated  | ephrina_ephapat<br>hway | 3 / 74   | 5 / 1685  | 0.017457 |
| Antigen processing and presentation          | KEGG PATHWAY | hsa04612                | 8 / 157  | 36 / 3361 | 0.008183 |

|                                               |              |                   |          |            |          |
|-----------------------------------------------|--------------|-------------------|----------|------------|----------|
| tyrosine degradation I                        | BioCyc       | TYRFUMCAT-PWY     | 3 (29)   | 4 / 562    | 0.016436 |
| Cell adhesion molecules (CAMs)                | KEGG PATHWAY | hsa04514          | 10 / 157 | 76 / 3361  | 0.039406 |
| classical complement pathway                  | PID BioCarta | 100200            | 3 (31)   | 5 / 896    | 0.013245 |
| Complement and coagulation cascades           | KEGG PATHWAY | hsa04610          | 11 / 157 | 24 / 3361  | 1.16E-06 |
| Common Pathway                                | PID Reactome | 500303            | 3 / 49   | 5 / 1236   | 0.017297 |
| Beta1 integrin cell surface interactions      | PID Curated  | integrin1_pathway | 7 / 74   | 46 / 1685  | 0.044873 |
| Hypertrophic cardiomyopathy (HCM)             | KEGG PATHWAY | hsa05410          | 10 / 157 | 65 / 3361  | 0.017293 |
| Wnt signaling pathway                         | PANTHER      | P00057            | 16 / 63  | 188 / 1442 | 0.045768 |
| <b>Up-regulated group (Enriched Diseases)</b> |              |                   |          |            |          |
| smoking cessation                             | GAD          |                   | 21 / 116 | 104 / 1707 | 0.000282 |
| Systemic infection                            | FunDO        | 2111              | 7 / 123  | 21 / 2232  | 0.004760 |
| Immune system diseases                        | KEGG DISEASE | None              | 12 / 33  | 54 / 462   | 0.005563 |
| REPRODUCTION                                  | GAD          |                   | 14 / 116 | 73 / 1707  | 0.009909 |
| Cardiac diseases                              | KEGG DISEASE | None              | 7 / 33   | 24 / 462   | 0.017292 |
| Classic complement pathway component defects  | KEGG DISEASE | H00102            | 4 / 33   | 7 / 462    | 0.017292 |
| pregnancy loss, recurrent                     | GAD          |                   | 4 / 116  | 7 / 1707   | 0.017292 |
| Cataract, pulverulent                         | OMIM         | None              | 3 / 102  | 4 / 1577   | 0.019259 |
| CHEMDEPENDENCY                                | GAD          |                   | 22 / 116 | 164 / 1707 | 0.019259 |

|                                   |              |        |          |           |          |
|-----------------------------------|--------------|--------|----------|-----------|----------|
| HIV                               | GAD          |        | 4 / 116  | 8 / 1707  | 0.020697 |
| antiphospholipid syndrome         | GAD          |        | 2 / 116  | 2 / 1707  | 0.044873 |
| C-reactive protein                | GAD          |        | 2 / 116  | 2 / 1707  | 0.044873 |
| Cataract, nuclear pulverulent     | OMIM         | None   | 2 / 102  | 2 / 1577  | 0.044873 |
| cerebrovascular disease, ischemic | GAD          |        | 2 / 116  | 2 / 1707  | 0.044873 |
| Holoprosencephaly-5               | OMIM         | None   | 2 / 102  | 2 / 1577  | 0.044873 |
| Polymyositis                      | FunDO        | 2046   | 2 / 123  | 2 / 2232  | 0.044873 |
| Retinopathy of Prematurity        | GAD          |        | 2 / 116  | 2 / 1707  | 0.044873 |
| Afibrinogenemia                   | KEGG DISEASE | H00222 | 2 / 33   | 2 / 462   | 0.045768 |
| Tyrosinemia                       | KEGG DISEASE | H00165 | 2 / 33   | 2 / 462   | 0.045768 |
| RENAL                             | GAD          |        | 9 / 116  | 50 / 1707 | 0.047967 |
| Stroke                            | GAD          |        | 5 / 116  | 18 / 1707 | 0.049472 |
| Alzheimer's disease               | GAD          |        | 12 / 116 | 79 / 1707 | 0.049615 |
| Circulatory system diseases       | KEGG DISEASE | None   | 9 / 33   | 51 / 462  | 0.049669 |

**Table S4: Real-time PCR primers used for the cDNA of both sepcies**

| Symbol     | Sequence (5`-3`)         |
|------------|--------------------------|
| Atp5a1-F   | CAAAGATGAACGACAACCTTCGG  |
| Atp5a1-R   | CGGATACCCTTGTAGAACAACCTC |
| Bactin1-F  | GAAGATCAAGATCATTGCTCCC   |
| Bactin1-R  | ATGTCATCTTGTTTCGAGAGGT   |
| Crx-a-F    | GCGTCGGGAGCGCACTAC       |
| Crxaa-F    | TCGGGAGCGCACTACCTTC      |
| Crxab-F    | TCGGGAGCGCACTACTTTT      |
| Crx-a-R    | CGGCATTTAGCACGACGGT      |
| Crybb1-F   | CGCAGTGATTGTCTCATGTC     |
| Crybb1-R   | TCAAACAGATACTGGTAGCCTC   |
| Crygs1-F   | GGCTACCAGTATGTTCTGACC    |
| Crygs1-R   | GATCCCATCTAGCACCTTACAG   |
| Hsp47-F    | CAGCAAGAAGCACTACAACCTACG |
| Hsp47-R    | TAGAAGCCGTAGATACCAGTGCG  |
| Hsp90ab1-F | TACATGATGGCCAAGAAACAC    |
| Hsp90ab1-R | CATCTTCATCAATACCCAAACCC  |
| Lrp5-F     | TTGGAGTTGCTGAGTGATCTG    |
| Lrp5-R     | ATAGTCTTGGTGATGACATCGG   |
| Nr2e3-F    | TTAAACCAGAAACACGAGGAC    |
| Nr2e3-R    | CAAAGTGAAGGGATGGAAGGA    |
| Nrl-F      | GCCTATACTGGTCGTTTCTTCC   |
| Nrl-R      | CGCAAATGTCTGTTTCAGCTC    |
| Opn1mw4-F  | GCTTGTTTGCACAGTCAAGG     |
| Opn1mw4-R  | ATTAAAGAAGATCCAGGCAGCA   |
| Otx-5-F    | TACTCGGTGAACGGCTTGA      |
| Otx-5-R    | GCTGCTGTTGACGGCACTT      |
| Otx2-F     | ATGTCGTATCTCAAGCAACCA    |
| Otx2-R     | CAAACCTGTACACGGGACTC     |
| Pde5aa-F   | CATCCCATCAGCAGATACCCTCT  |
| Pde5aa-R   | CTCTTTAGTTCCTTTGTCTGCAGC |



---

| Symbol  | Sequence (5`-3`)        |
|---------|-------------------------|
| Rho-F   | AACCCGTGCATCTACATCTG    |
| Rho-R   | CTTTGTGGTCTCTGTGTCGT    |
| Rps11-F | CCAAGATGAAGATGCAGAGGA   |
| Rps11-R | TTCAGGACGTTGAACCTCAC    |
| Sox2-F  | CGGAAATAAGCAAGCGACTC    |
| Sox2-R  | CTTGCCTTCTTCATGAGGGT    |
| Wnt-2-F | TCATGAACTTGCACAACAACC   |
| Wnt-2-R | TCTTAAACATCCTGTAGGCACTG |

---

**Table S5: Genbank/Ensembl accession numbers for *zic1* and *gpr85* nucleotide sequences**

| Species                              | Common name                          | Accession numbers  |                    |
|--------------------------------------|--------------------------------------|--------------------|--------------------|
|                                      |                                      | <i>zic1</i>        | <i>gpr85</i>       |
| <i>Homo sapiens</i>                  | Human                                | NM_003412          | NM_001146265       |
| <i>Gallus gallus</i>                 | Chicken                              | NM_204254          | XM_416019          |
| <i>Xenopus tropicalis</i>            | Western clawed frog                  | ENSXETT00000033767 | NM_001078822       |
| <i>Lepisosteus osseus</i>            | Longnose gar                         | EU001886           | EU002141           |
| <i>Amia calva</i>                    | Bowfin                               | EF032909           | EF033026           |
| <i>Hiodon alosoides</i>              | Goldeye                              | EU001866           | EU002120           |
| <i>Oncorhynchus mykiss</i>           | Rainbow trout                        | EF032911           | EF033028           |
| <i>Gadus morhua</i>                  | Atlantic cod                         | EU001871           | EU002126           |
| <i>Oryzias latipes</i>               | Medaka                               | ENSORLT00000012607 | ENSORLT00000013169 |
| <i>Oreochromis niloticus</i>         | Nile tilapia                         | EF032915           | EF033032           |
| <i>Gasterosteus aculeatus</i>        | Three-spined stickleback             | ENSGACT00000004841 | ENSGACT00000025057 |
| <i>Tetraodon nigroviridis</i>        | Spotted green pufferfish             | ENSTNIT00000015940 | ENSTNIT00000021929 |
| <i>Takifugu rubripes</i>             | Fugu                                 | ENSTRUT00000045674 | ENSTRUT00000005315 |
| <i>Ictalurus punctatus</i>           | Channel catfish                      | EF032916           | EF033033           |
| <i>Danio rerio</i>                   | Zebrafish                            | NM_130933          | NM_131499          |
| <i>Sinocyclocheilus anophthalmus</i> | blind goldenline barbel              | zic1a: JX403564    | gpr85a: JX403568   |
|                                      |                                      | zic1b: JX403565    | gpr85b: JX403569   |
| <i>Sinocyclocheilus angustiporus</i> | small gill opening goldenline barbel | zic1a: JX403566    | gpr85a: JX403570   |
|                                      |                                      | zic1b: JX403567    | gpr85b: JX403571   |

**Figure S1:** Phylogeny of species and families referred to in this paper. (Adapted from (Tang et al. 2010; Wu et al. 2010; Near et al. 2012)).

**Figure S2:** Contig size distribution of *Sinocyclocheilus* transcriptomes.

**Figure S3:** Gene expression levels were detected by real-time PCR using RNA isolated from eyes of each species. The expression levels of *crybb1*, *hsp90ab1*, *lrp5*, *nrl*, *opn1mw4*, *otx5*, *rps11* and *wnt2* were quantified and normalized to *beta-actin1*. Relative expression values are mean  $\pm$  s.d. of at least three independent experiments.

**Figure S4:** Gene ontology (GO) ID representations for down-regulated genes (green) and up-regulated group (red). Three comparisons are shown: (A) cellular component ontology; (B) biological processed ontology; (C) molecular function ontology.

**Figure S5:** Collection sites for surface fish *Sinocyclocheilus angustiporus* (A) and cavefish *Sinocyclocheilus anophthalmus*. The inset is a map of China with a filled rectangle representing the area of the larger map. The red circle indicates the collection location of cavefish *Sinocyclocheilus anophthalmus* (N 25.05478°, E 103.37975°). Red triangles indicate the locations of surface fish *Sinocyclocheilus*

*angustiporus*. Surface fish were collected from Huangnihe River in Agang Town, Luoping (N 25.00905°, E 103.59256°). Longitude and latitude: 105E and 25N.

**Figure S6:** Average identities of paralogs or orthologs comparing surface fish, cave fish, zebrafish and human for 16 genes.

**Reference:**

- Near, TJ, RI Eytan, A Dornburg, KL Kuhn, JA Moore, MP Davis, PC Wainwright, M Friedman, WL Smith. 2012. Resolution of ray-finned fish phylogeny and timing of diversification. *Proc Natl Acad Sci U S A* 109:13698-13703.
- Tang, KL, MK Agnew, MV Hirt, et al. 2010. Systematics of the subfamily Danioninae (Teleostei: Cypriniformes: Cyprinidae). *Mol Phylogenet Evol* 57:189-214.
- Wu, X, L Wang, S Chen, R Zan, H Xiao, YP Zhang. 2010. The complete mitochondrial genomes of two species from *Sinocyclocheilus* (Cypriniformes: Cyprinidae) and a phylogenetic analysis within Cyprininae. *Mol Biol Rep* 37:2163-2171.

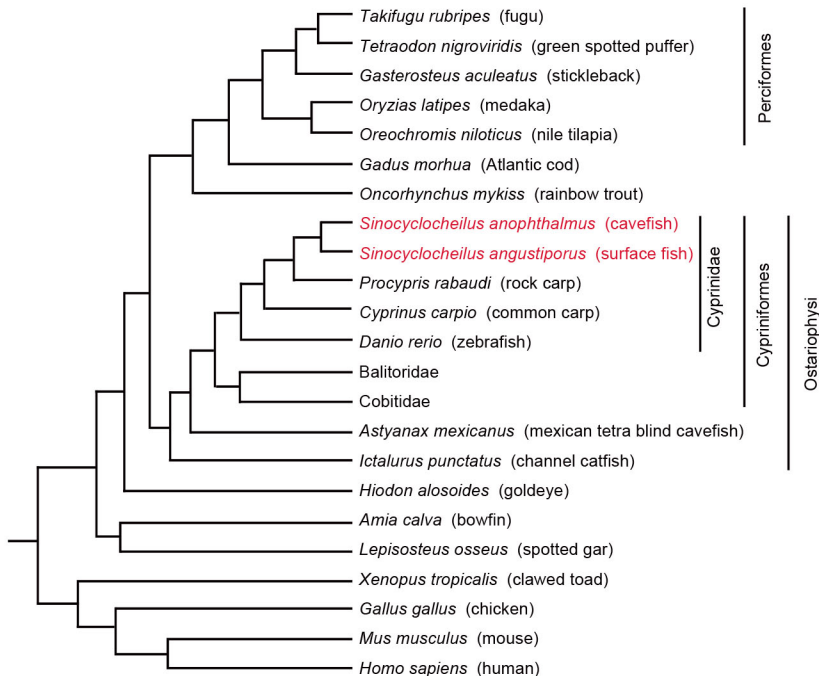

Figure S1

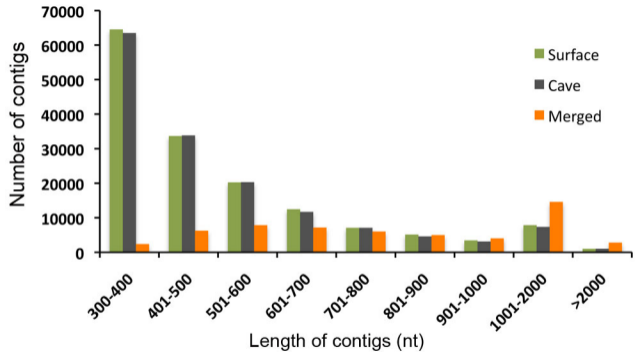

Figure S2

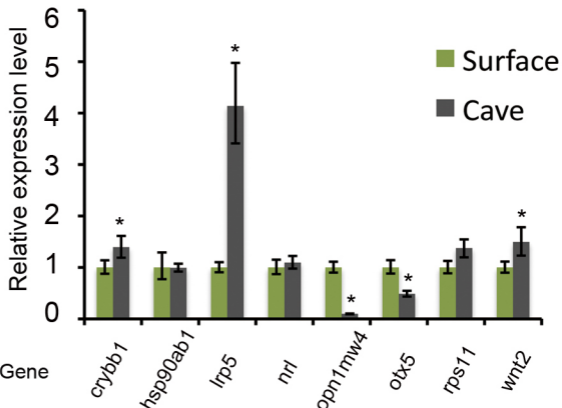

|                                     |      |       |      |      |       |       |      |       |
|-------------------------------------|------|-------|------|------|-------|-------|------|-------|
| Real-time PCR                       | 0.48 | -0.01 | 2.05 | 0.13 | -3.35 | -1.04 | 0.46 | -0.58 |
| RNA-seq                             | 1.15 | 0.58  | 0.86 | 0.32 | -0.92 | -1.17 | 0.35 | -2.01 |
| Fold change of Cave to Surface fish |      |       |      |      |       |       |      |       |

Figure S3



A

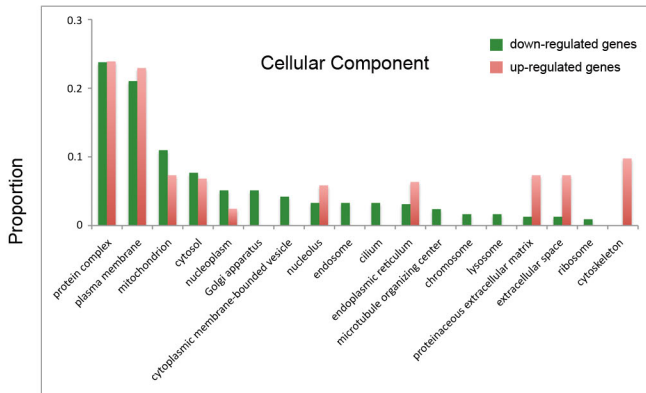

B

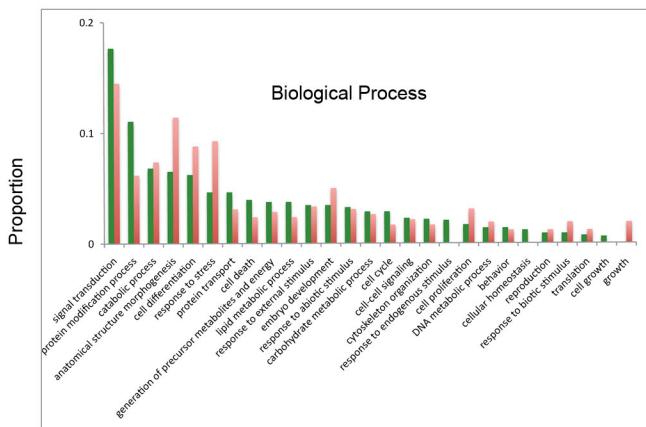

C

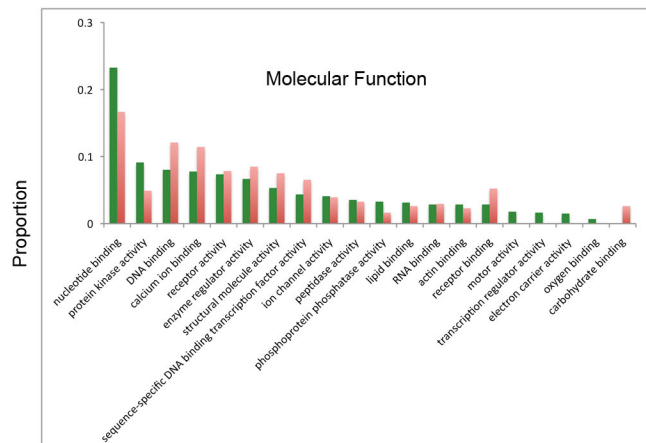

Figure S4

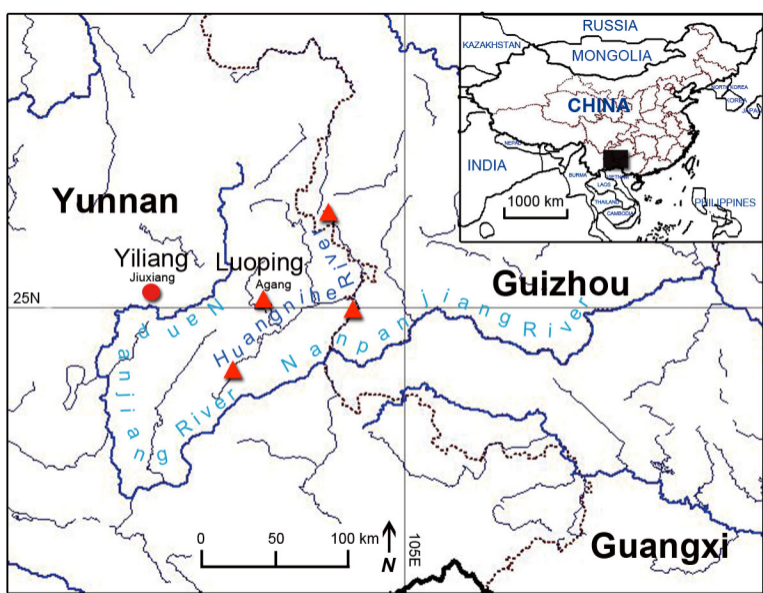

Figure S5

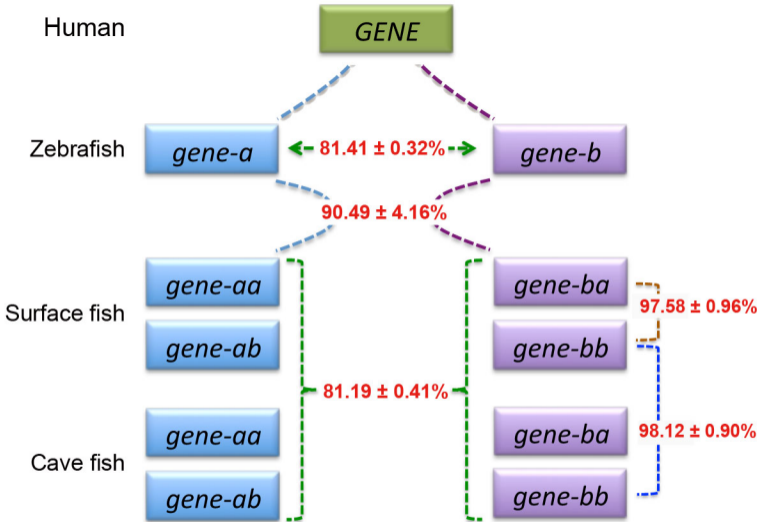

Figure S6
